# Supplementary material for: Radiomic and gEnomic approaches for the enhanced DIagnosis of clear cell REnal Cancer (REDIRECt): a translational pilot methodological study
Source: PubMed Central journal article supplement — Transl Androl Urol. 2022 Feb;11(2):149–58. doi: 10.21037/tau-21-713 (PMC8899146; doi:10.21037/tau-21-713), 2022-02
Supplement: tau-11-02-149-dss.pdf [file tau-11-02-149-dss.pdf]

## Data Sharing Statement

|                     |                                                                                                                                                     |                                                                                                                                                                                                                                                                                                                                                                                                                      |
|---------------------|-----------------------------------------------------------------------------------------------------------------------------------------------------|----------------------------------------------------------------------------------------------------------------------------------------------------------------------------------------------------------------------------------------------------------------------------------------------------------------------------------------------------------------------------------------------------------------------|
| <b>Article Info</b> | https://dx.doi.org/10.21037/tau-21-713                                                                                                              |                                                                                                                                                                                                                                                                                                                                                                                                                      |
| <b>Item</b>         | <b>Question</b>                                                                                                                                     | <b>Authors' Response</b><br>(place "-" if not applicable)                                                                                                                                                                                                                                                                                                                                                            |
| 1                   | Would you like to share data collected for your study to others?                                                                                    | YES                                                                                                                                                                                                                                                                                                                                                                                                                  |
| 2                   | If not, would you like to share the reason for your decision?                                                                                       | -                                                                                                                                                                                                                                                                                                                                                                                                                    |
| 3                   | What data in particular will be shared?                                                                                                             | RNA-sequencing data are deposited deposited in NCBI's Gene Expression Omnibus accessible through GEO Series (accession number GSE133460, link: <a href="https://www.ncbi.nlm.nih.gov/geo/query/acc.cgi?acc=GSE133460">https://www.ncbi.nlm.nih.gov/geo/query/acc.cgi?acc=GSE133460</a> ).                                                                                                                            |
| 4                   | Any other documents will be shared? Such as study protocol, statistical analysis plan, informed consent form, clinical study report, analytic code. | Study protocol and statistical analysis plan are yet described in supplementary material. Analytic code can be sent upon request to the corresponding Author.                                                                                                                                                                                                                                                        |
| 5                   | When will data availability begin?                                                                                                                  | Data are yet available online in NCBI's Gene Expression Omnibus accessible through GEO Series (accession number GSE133460, link: <a href="https://www.ncbi.nlm.nih.gov/geo/query/acc.cgi?acc=GSE133460">https://www.ncbi.nlm.nih.gov/geo/query/acc.cgi?acc=GSE133460</a> ).<br>For statistical code please write to the corresponding Author: <a href="mailto:capitanio.umberto@hsr.it">capitanio.umberto@hsr.it</a> |
| 6                   | When will data availability end?                                                                                                                    | Never                                                                                                                                                                                                                                                                                                                                                                                                                |
| 7                   | To whom will you share the data?                                                                                                                    | Everyone can access online data. For analytical code data will be sent upon kind request to the corresponding author.                                                                                                                                                                                                                                                                                                |
| 8                   | For what type of analysis or purpose?                                                                                                               | Research purpose                                                                                                                                                                                                                                                                                                                                                                                                     |
| 9                   | How or where can the data/documents be obtained?                                                                                                    | NCBI's Gene Expression Omnibus accessible through GEO Series (accession number GSE133460, link: <a href="https://www.ncbi.nlm.nih.gov/geo/query/acc.cgi?acc=GSE133460">https://www.ncbi.nlm.nih.gov/geo/query/acc.cgi?acc=GSE133460</a> ).                                                                                                                                                                           |
| 10                  | Any other restrictions?                                                                                                                             | No                                                                                                                                                                                                                                                                                                                                                                                                                   |
